# Supplementary material for: A symmetric direct ammonia fuel cell using ternary NiCuFe alloy embedded in a carbon network as electrodes
Source: Royal Society of Chemistry journal article supplement (doi:10.1039/d2ta04129d), 2022-01-01
Supplement: d2ta04129d1.pdf [file d2ta04129d1.pdf]

# **A symmetric direct ammonia fuel cell using ternary NiCuFe alloy embedded in carbon network as electrodes**

Mengfei Zhang<sup>a</sup>, Jie Zhang<sup>b</sup>, Georgina Jeerh<sup>a</sup>, Peimiao Zou<sup>a</sup>, Boyao Sun<sup>a</sup>, Marc Walker<sup>c</sup>, Kui  
Xie<sup>b</sup>, Shanwen Tao<sup>a, d\*</sup>

<sup>a</sup> School of Engineering, University of Warwick, Coventry, CV4 7AL, UK

E-mail: [s.tao.1@warwick.ac.uk](mailto:s.tao.1@warwick.ac.uk)

<sup>b</sup> Key Laboratory of Design and Assembly of Functional Nanostructures, Fujian Institute of Research on the Structure of Matter, Chinese Academy of Sciences, Fuzhou, Fujian 350002, China

<sup>c</sup> Department of Physics, University of Warwick, Coventry CV4 7AL, UK

<sup>d</sup> Department of Chemical Engineering, Monash University, Clayton, Victoria 3800, Australia

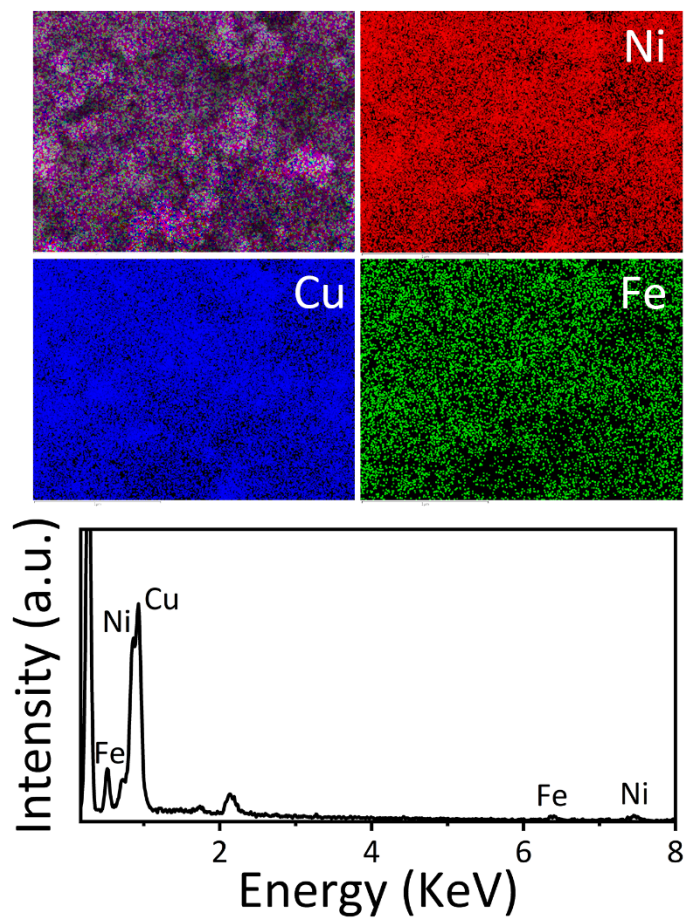

**Figure S1.** EDS mapping images and EDS spectrum of NiCuFe1/C.

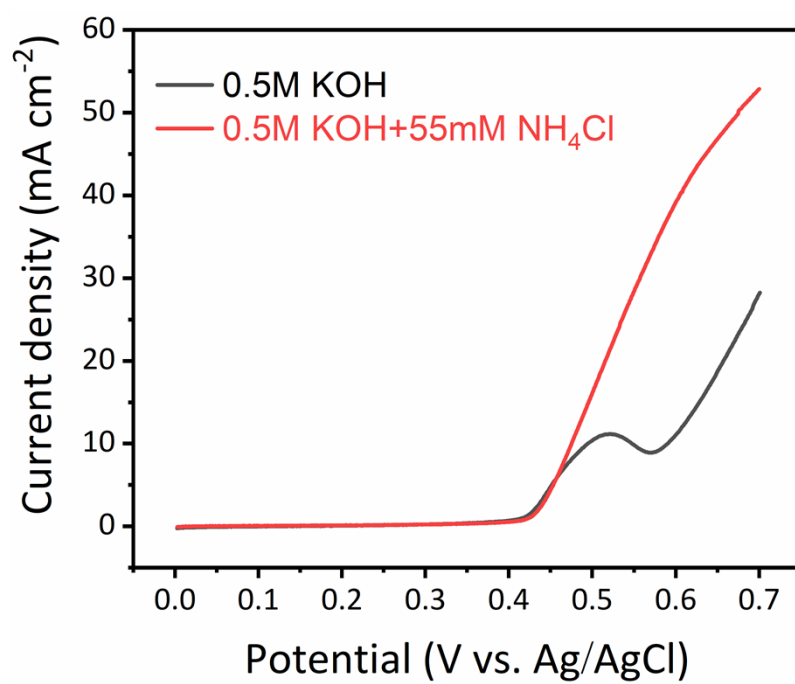

**Figure S2.** LSV curves of NiCuFe1/C in 0.5 M KOH, 0.5 M KOH+55 mM NH<sub>4</sub>Cl at a scan rate of 2 mV s<sup>-1</sup>.

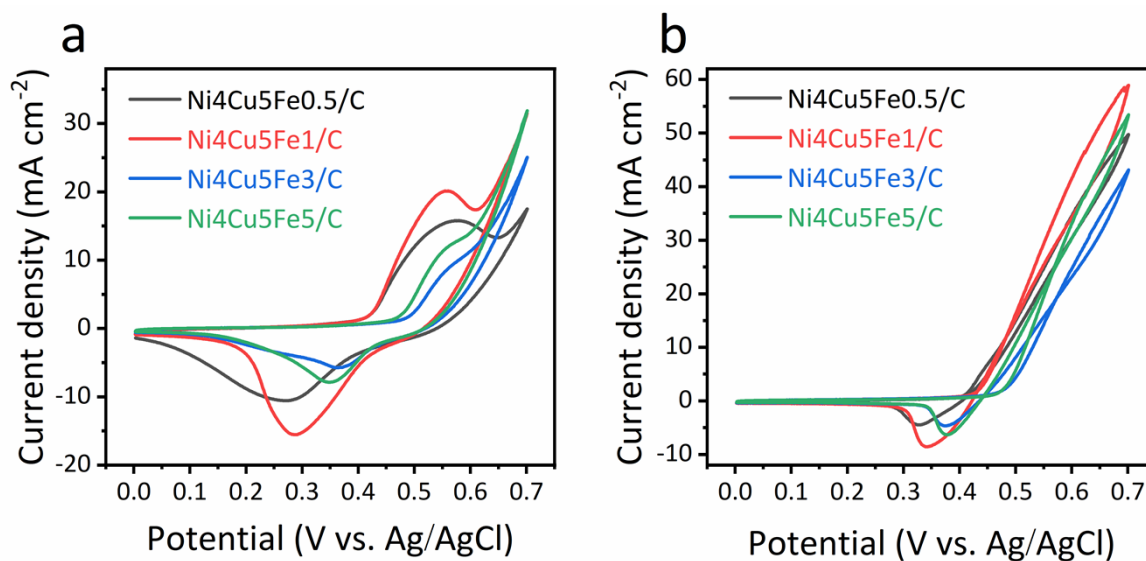

**Figure S3.** CV curves of NiCuFe<sub>0.5</sub>/C, NiCuFe<sub>1</sub>/C, NiCuFe<sub>3</sub>/C, NiCuFe<sub>5</sub>/C in (a) 0.5 M KOH, (b) 0.5 M KOH+55 mM NH<sub>4</sub>Cl at a scan rate of 5 mV s<sup>-1</sup>.

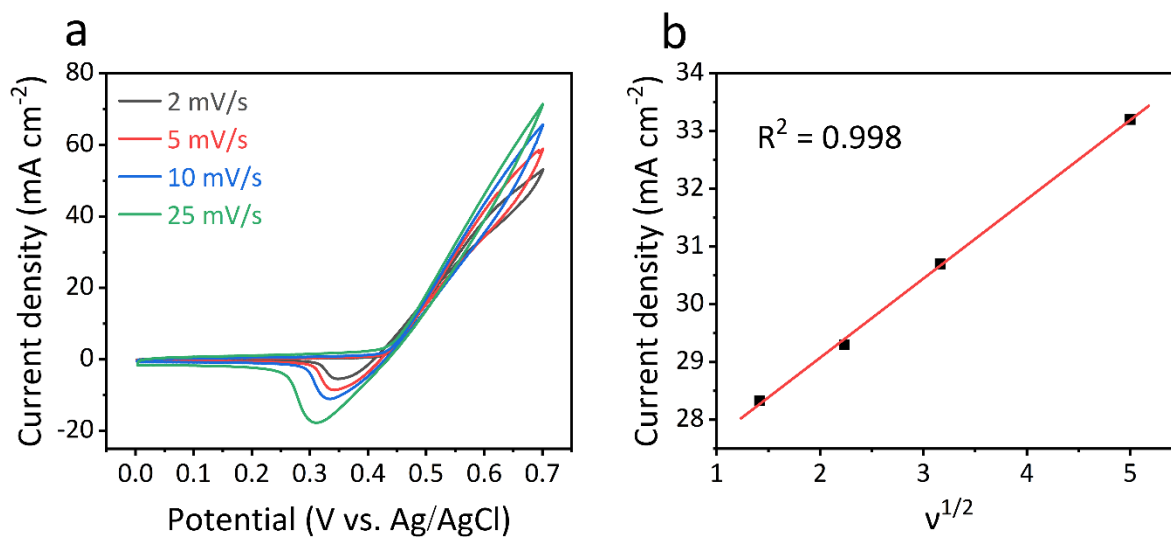

**Figure S4.** (a) CV curves of NiCuFe1/C in 0.5 M KOH+55 mM NH<sub>4</sub>Cl at different scan rates. (b) plots of the square root of the current density vary with scan rate for NiCuFe1/C.

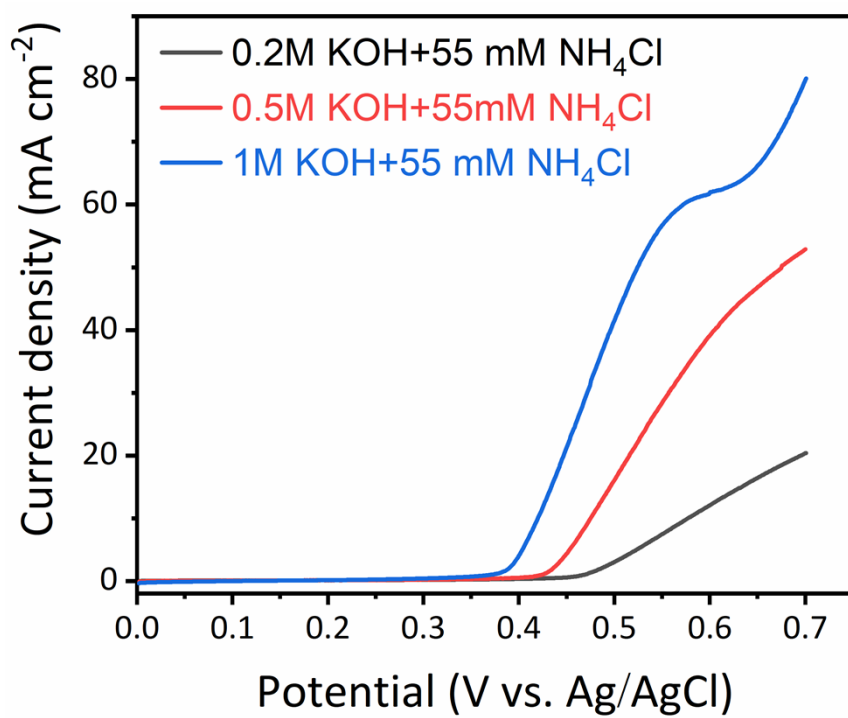

**Figure S5.** LSV curves of NiCuFe1/C in 55 mM NH<sub>4</sub>Cl with different KOH concentration.

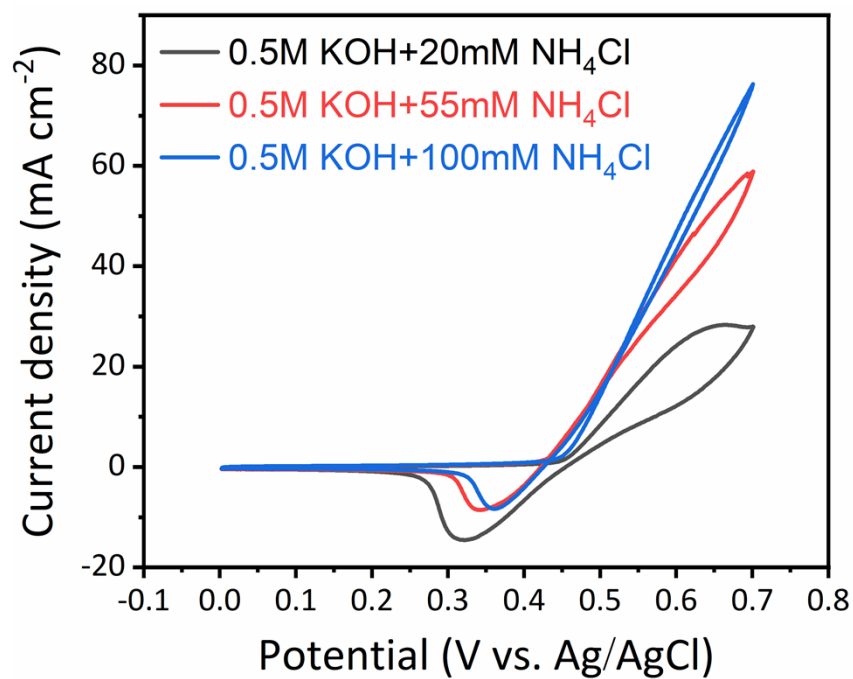

**Figure S6.** CV curves of NiCuFe1/C in 0.5 M KOH with different ammonia concentration at a scan rate of 5 mV s<sup>-1</sup>.

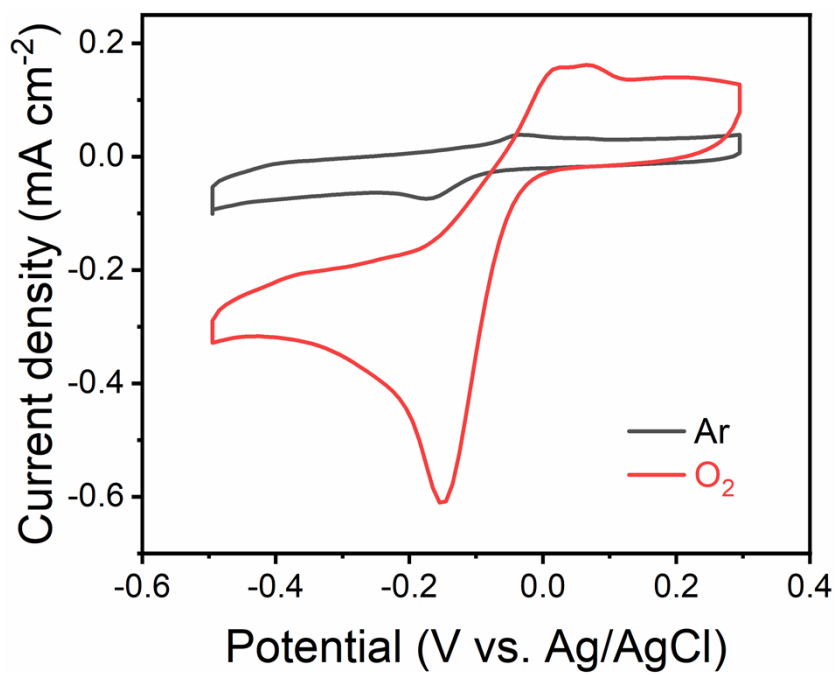

**Figure S7.** CV curves of NiCu/C in Ar or O<sub>2</sub>-saturated 0.1 M KOH.



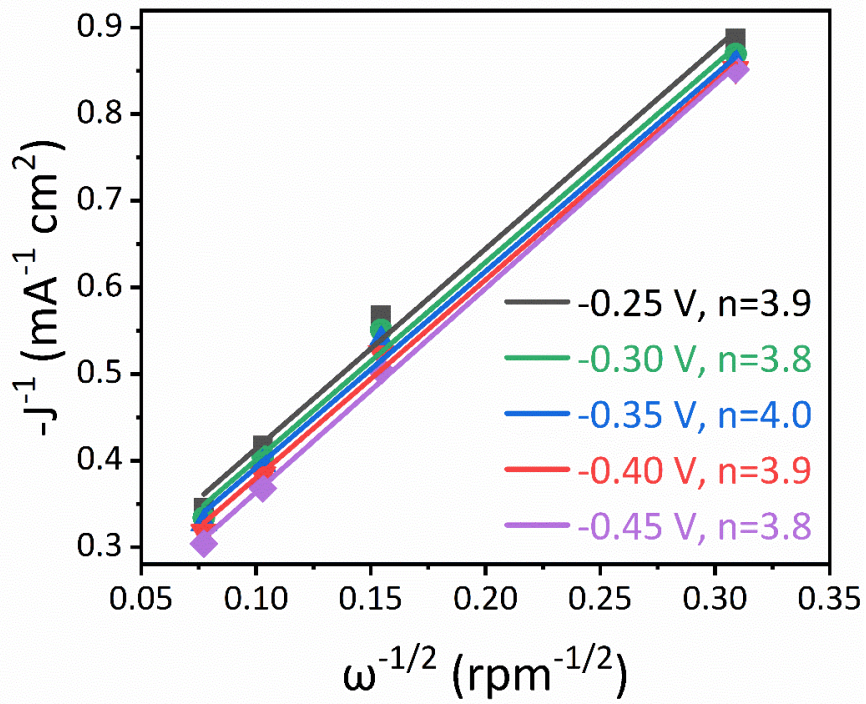

**Figure S8.** The fitted K-L plots of NiCuFe1/C at different potentials.

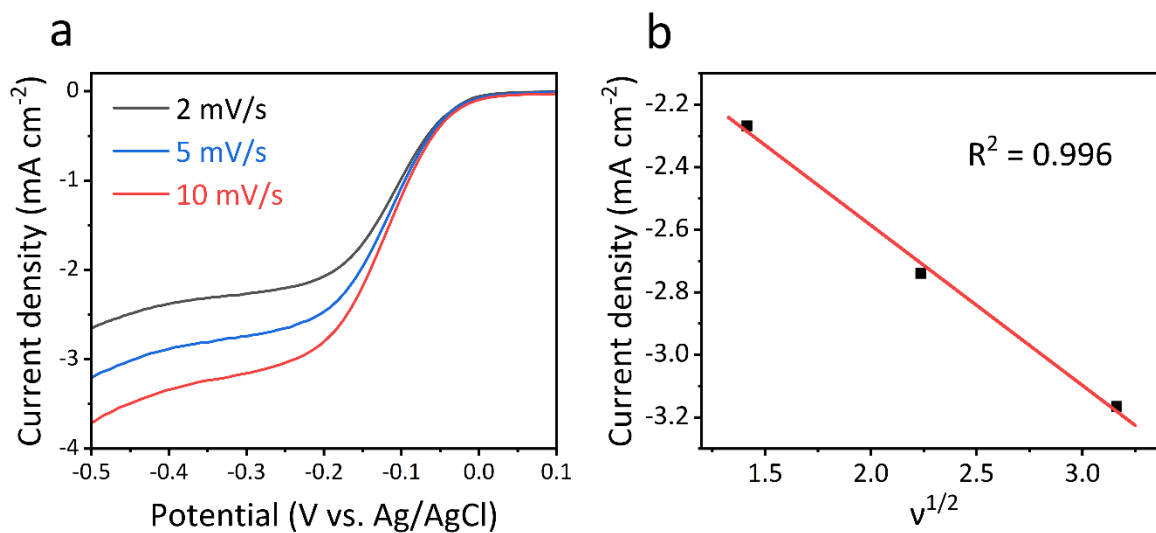

**Figure S9.** (a) LSV curves and (b) current density versus square root of the scan rate of NiCuFe1/C in O<sub>2</sub>-saturated 0.1 M KOH at different scan rates.

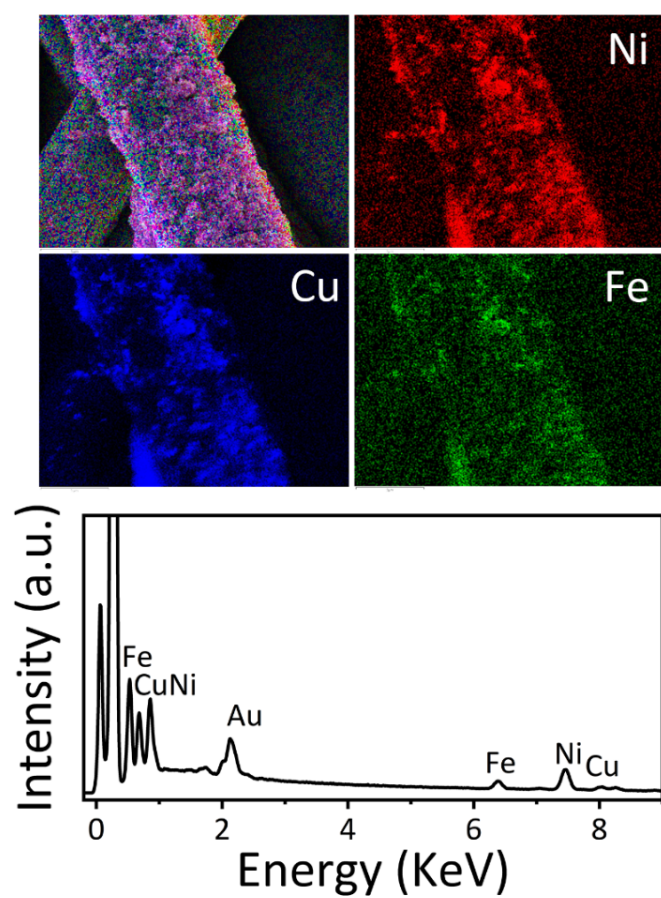

**Figure S10.** EDS Mapping images and EDS spectrum of NiCuFe1/C electrode before test.

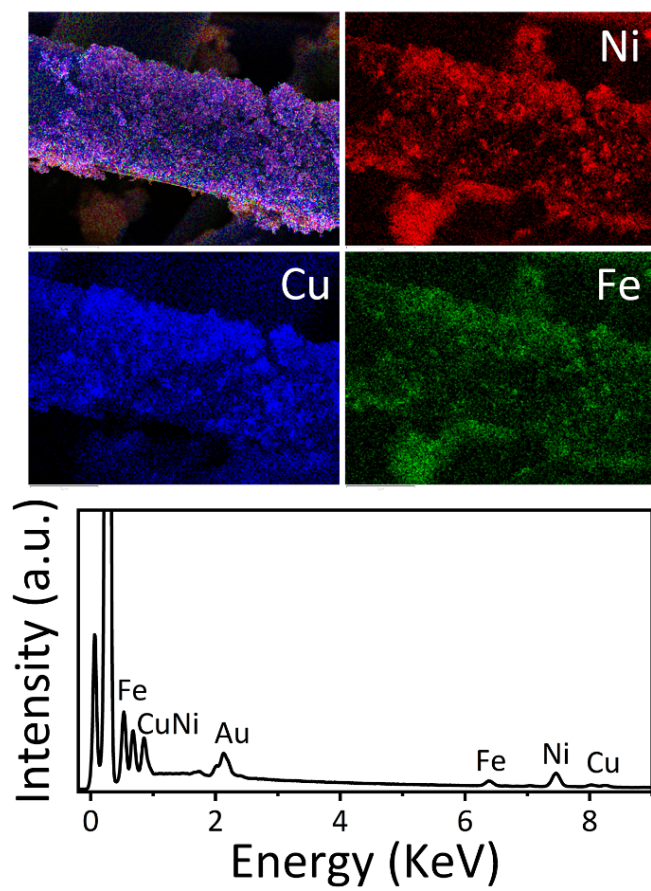

**Figure S11.** EDS Mapping images and EDS spectrum of NiCuFe1/C anode after test.

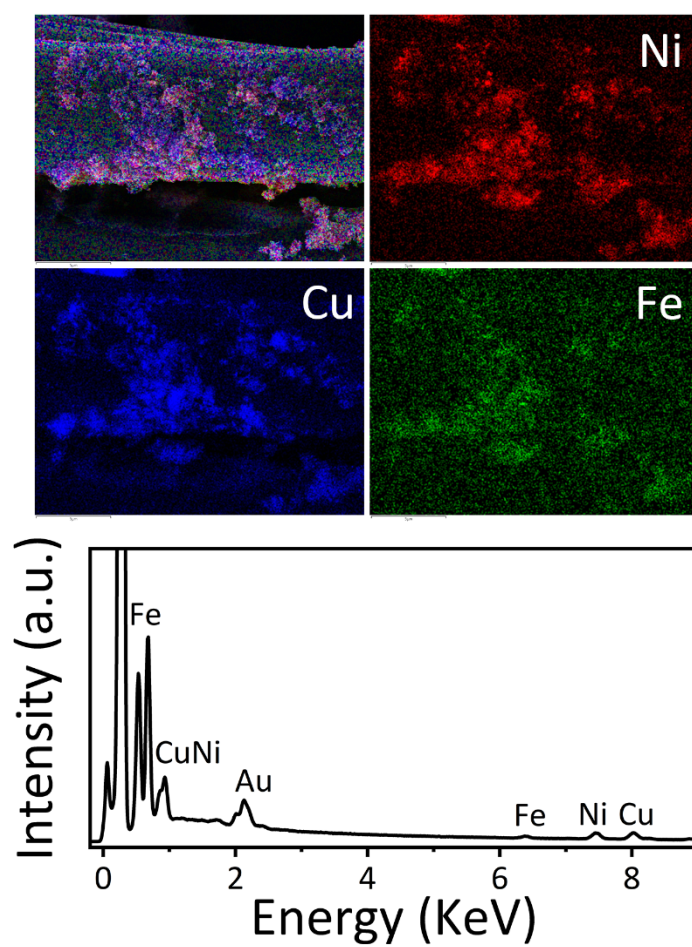

**Figure S12.** EDS Mapping images and EDS spectrum of NiCuFe1/C cathode after test.

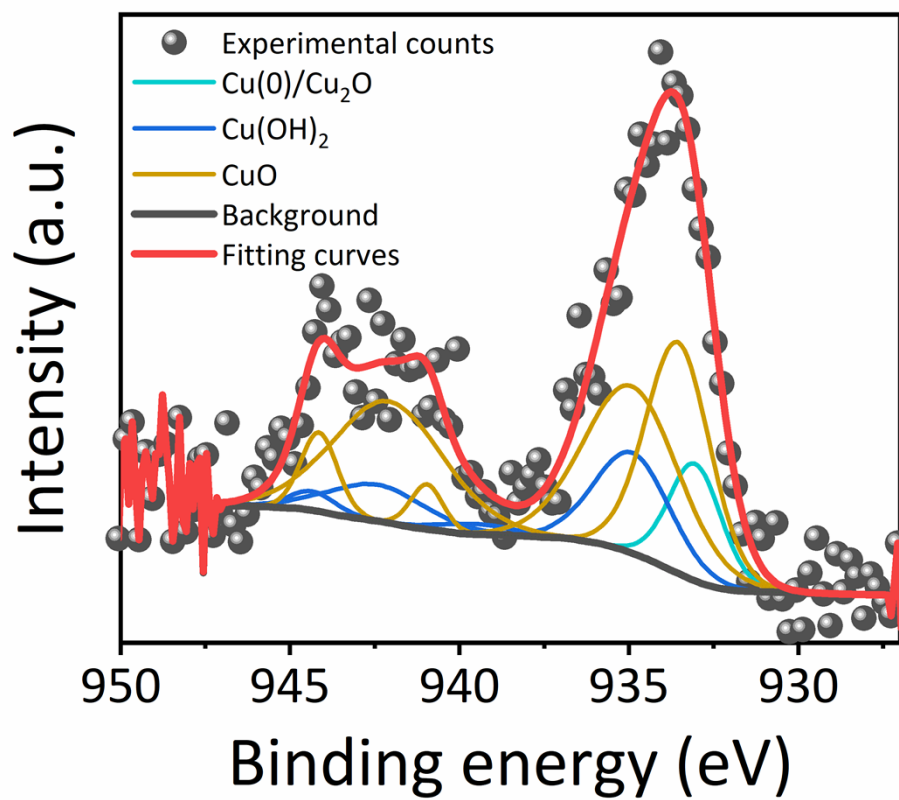

**Figure S13.** XPS spectrum of Cu $2p_{3/2}$  in Ni<sub>4</sub>Cu<sub>5</sub>Fe<sub>1</sub>/C anode.

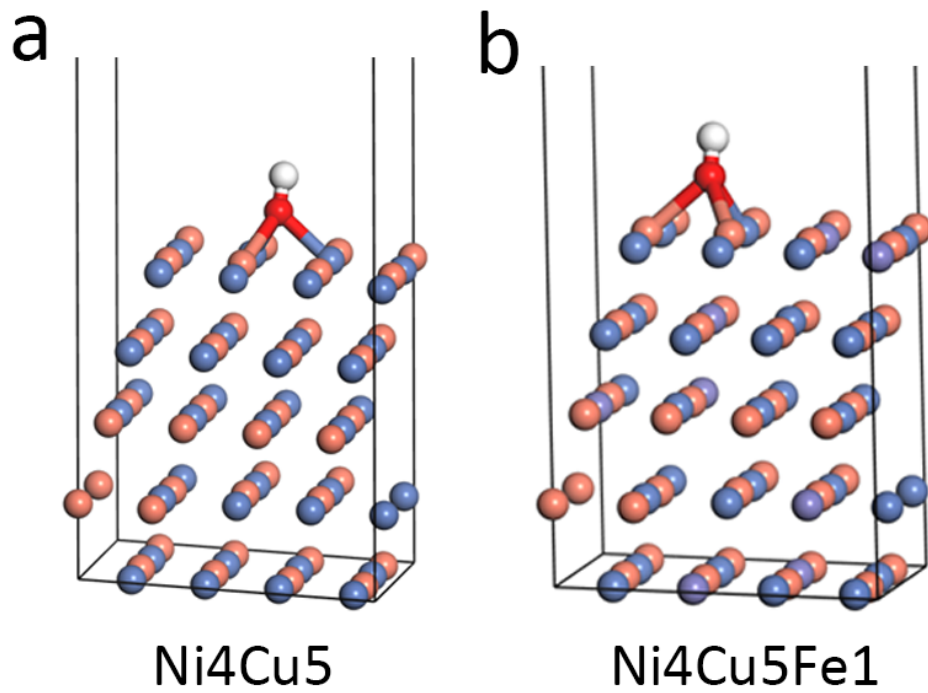

**Figure S14.** Slab model and OH adsorption on the surfaces of NiCu and NiCuFe1.

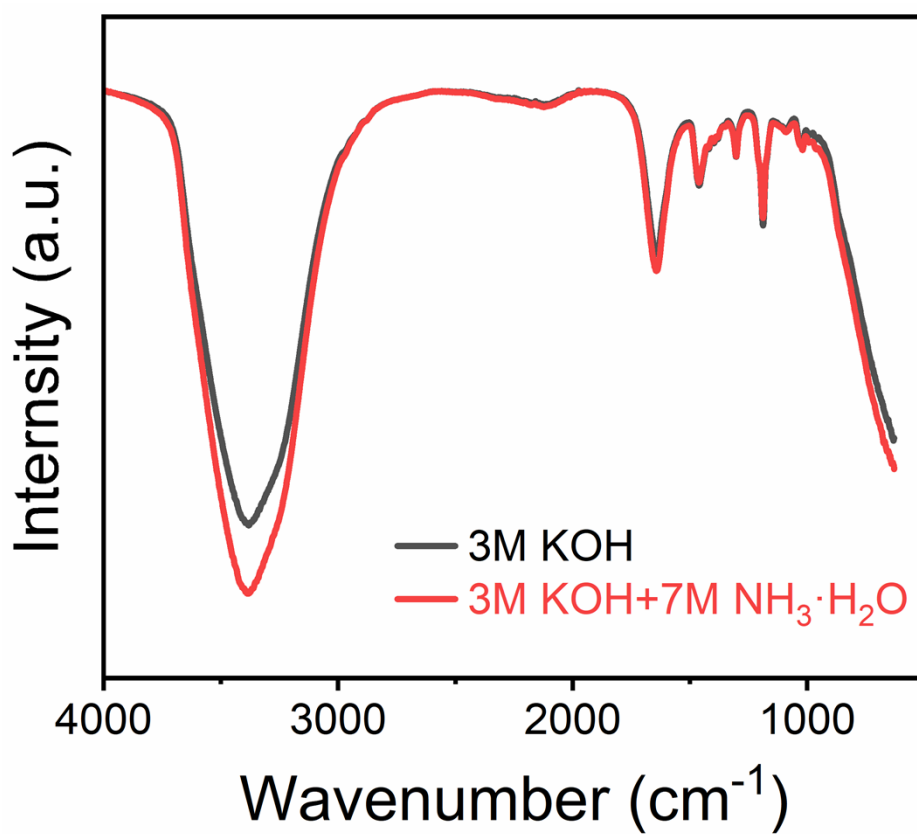

**Figure S15.** FTIR spectra of AEMs after immersed in 3 M KOH and 3 M KOH + 7 M  $\text{NH}_3 \cdot \text{H}_2\text{O}$  for 24 h.



**Table S1** The composition calculated from XRF results.

| Samples     | XRF results |      |      |      |      | The composition calculated from XRF |
|-------------|-------------|------|------|------|------|-------------------------------------|
|             | Ni          | Cu   | Fe   | P    | S    |                                     |
| Ni4Cu5      | 41.1        | 57.4 | 0    | 0.64 | 0.42 | Ni4Cu5.59                           |
| Ni4Cu5Fe0.5 | 39.8        | 52.9 | 2.83 | 0.64 | 0.40 | Ni4Cu5.32Fe0.28                     |
| Ni4Cu5Fe1   | 37.8        | 53.2 | 7.71 | 0.58 | 0.37 | Ni4Cu5.63Fe0.82                     |
| Ni4Cu5Fe3   | 33.2        | 45   | 20.5 | 0.53 | 0.34 | Ni4Cu5.42Fe2.47                     |

**Table S2** Comparison of DAFC performance with literature results for DAFCs with non-precious metal catalysts in the electrodes.

| Anode                                              | Cathode                                                                                       | Fuel                                                  | T/°C | OCV/V | Peak current density/<br>mA cm <sup>-2</sup> | Peak current density / mW cm <sup>-2</sup> | Ref.             |
|----------------------------------------------------|-----------------------------------------------------------------------------------------------|-------------------------------------------------------|------|-------|----------------------------------------------|--------------------------------------------|------------------|
| NiCu/C                                             | SrCo <sub>0.8</sub> Cu <sub>0.1</sub> Nb <sub>0.1</sub> O <sub>3-<math>\delta</math></sub> /C | 1M NaOH<br>+ 35%<br>NH <sub>3</sub> ·H <sub>2</sub> O | 25   | 0.45  | ~2.2                                         | 0.25                                       | 1                |
| NiCu/C                                             | SrFe <sub>0.8</sub> Cu <sub>0.1</sub> Nb <sub>0.1</sub> O <sub>3-<math>\delta</math></sub> /C | 1M NaOH<br>+ 5M<br>NH <sub>3</sub> ·H <sub>2</sub> O  | 25   | 0.46  | ~2.5                                         | 0.35                                       | 2                |
| NiCu/C                                             | $\alpha$ -MnO <sub>2</sub> /C                                                                 | 3M<br>NH <sub>3</sub> ·H <sub>2</sub> O               | 25   | 0.39  | 2.1                                          | 0.35                                       | 3                |
| Ni/C                                               | MnO <sub>2</sub> /C                                                                           | 35%<br>NH <sub>3</sub> ·H <sub>2</sub> O              | 25   | 0.77  | ~10                                          | 3.6                                        | 4                |
| CDN/C                                              | MnO <sub>2</sub> /C                                                                           | 35%<br>NH <sub>3</sub> ·H <sub>2</sub> O              | 80   | 0.8   | 32                                           | 9                                          | 5                |
| Ni <sub>4</sub> Cu <sub>5</sub> Fe <sub>1</sub> /C | Ni <sub>4</sub> Cu <sub>5</sub> Fe <sub>1</sub> /C                                            | 3M<br>KOH+7M<br>NH <sub>3</sub> ·H <sub>2</sub> O     | 80   | 0.62  | 31                                           | 8.9                                        | <b>This work</b> |

## References

1. P. Zou, S. Chen, R. Lan and S. Tao, *ChemSusChem*, 2019, **12**, 2788-2794.
2. P. Zou, S. Chen, R. Lan, J. Humphreys, G. Jeerh and S. Tao, *Int. J. Hydrog. Energy*, 2019, **44**, 26554-26564.
3. M. Zhang, P. Zou, G. Jeerh, S. Chen, J. Shields, H. Wang and S. Tao, *ACS Sustain. Chem. Eng.*, 2020, **8**, 12817-12824.
4. R. Lan and S. Tao, *ECS Electrochem. Lett.*, 2013, **2**, F37-F40.
5. R. Lan and S. Tao, *Electrochem. Solid-State Lett.*, 2010, **13**, B83-B86.
